# Supplementary material for: Whole Mitochondrial Genome Detection and Analysis of Two- to Four-Generation Maternal Pedigrees Using a New Massively Parallel Sequencing Panel
Source: MDPI journal article supplement (doi:10.3390/genes14040912), 2023-04-14
Supplement: s1 [file s1]

Supplementary Figure S1. Family tree of the four-generation and three-generation pedigree. a. The four-generation pedigree. b. The three-generation pedigree. Individuals without sample ID were not included in this study.

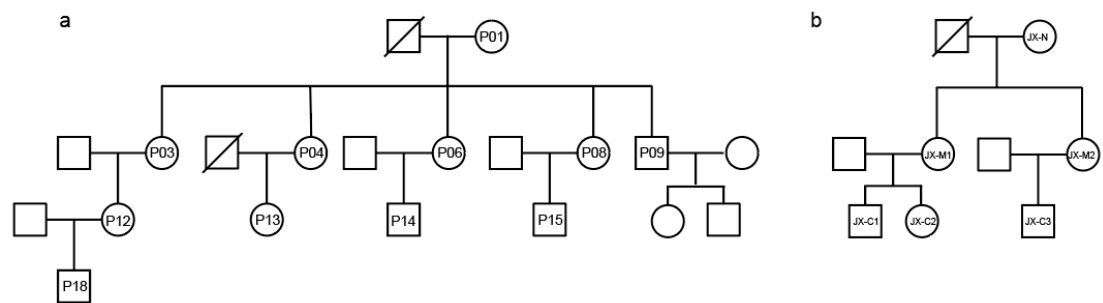

Supplementary Figure S2. Relative read depth of three negative controls and HL60.

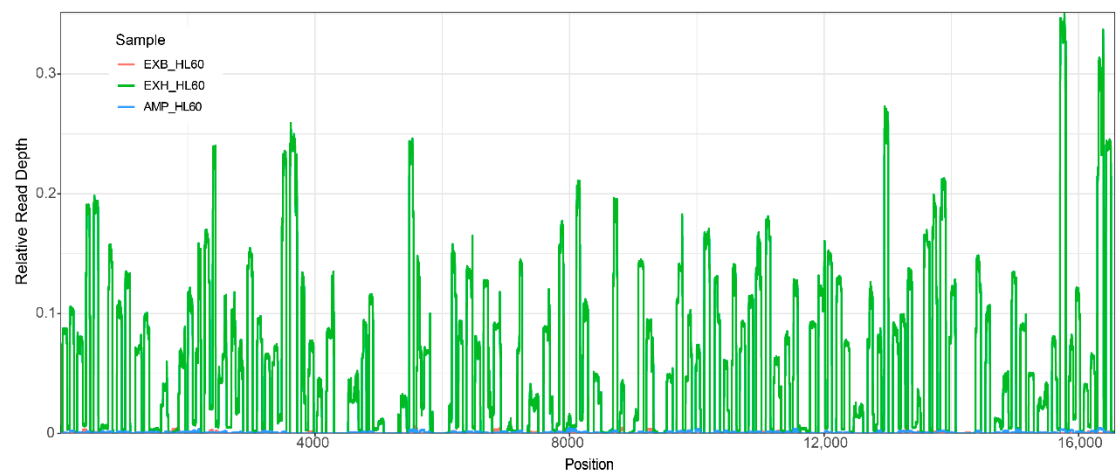

Supplementary Figure S3. Total read depth and mtGenome coverage of the twice-sequenced libraries.

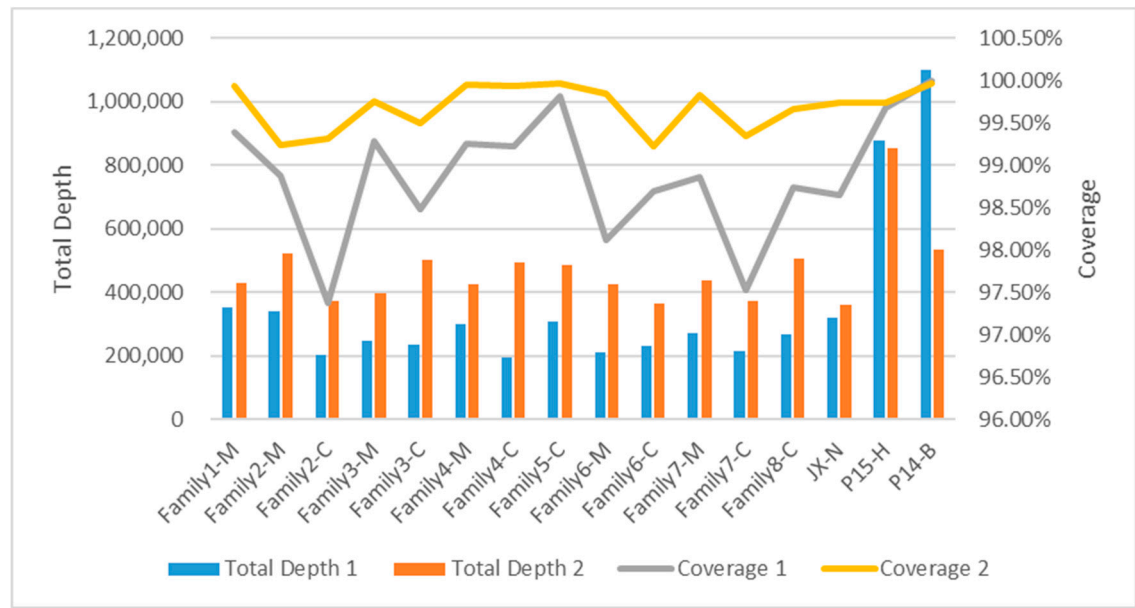

Supplementary Figure S4. Distribution of PHP count of the 44 detected samples.

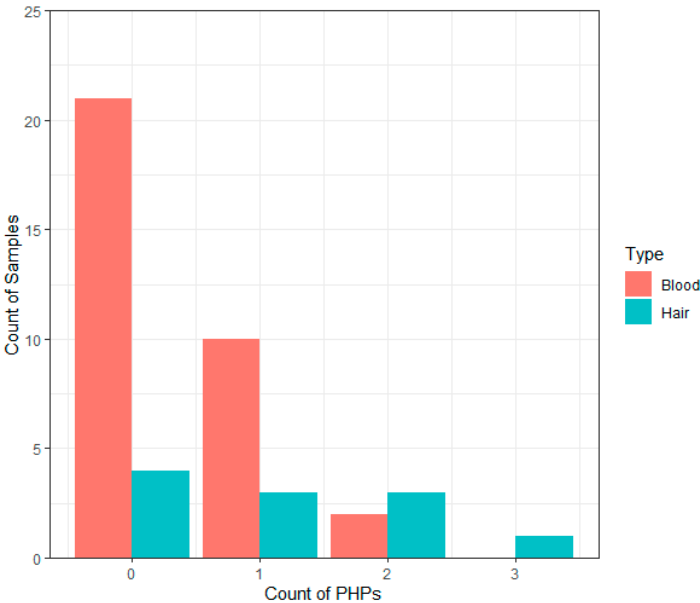

Supplementary Figure S5. Count of different variants of all compared maternal relatives.

- a. Count of different variants of full-siblings.
- b. Count of different variants of maternal grandmother and maternal grandson/granddaughter.
- c. Count of different variants of maternal aunt and maternal nephew/niece.
- d. Count of different variants of maternal uncle and maternal nephew/niece.
- e. Count of different variants of maternal first cousins.
- f. Count of different variants of maternal great grandmother and maternal great grandson.
- g. Count of different variants of maternal grandaunt and maternal grandnephew.
- h. Count of different variants of maternal granduncle and maternal grandnephew.
- i. Count of different variants of maternal cousin-aunt and maternal cousin-nephew.
- j. Count of different variants of maternal cousin-uncle and maternal cousin-nephew.

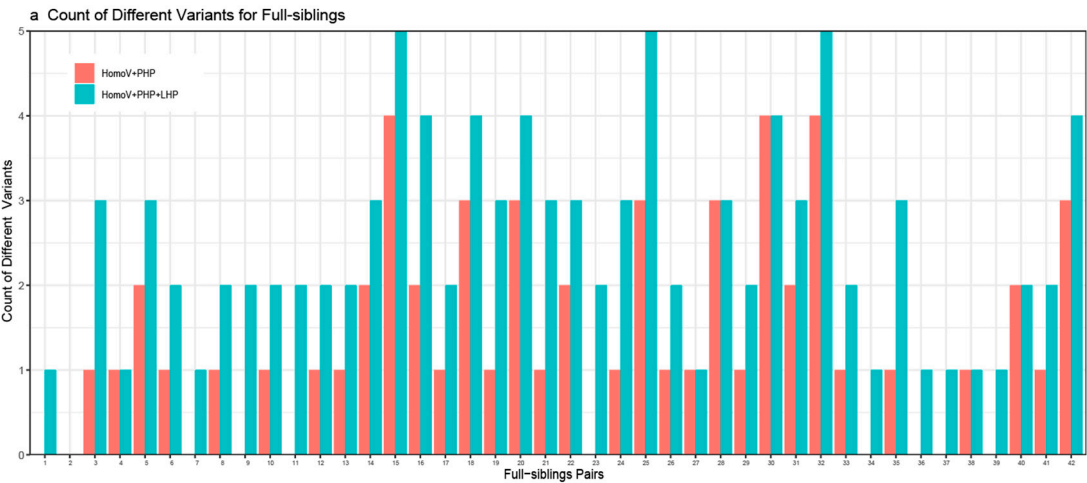

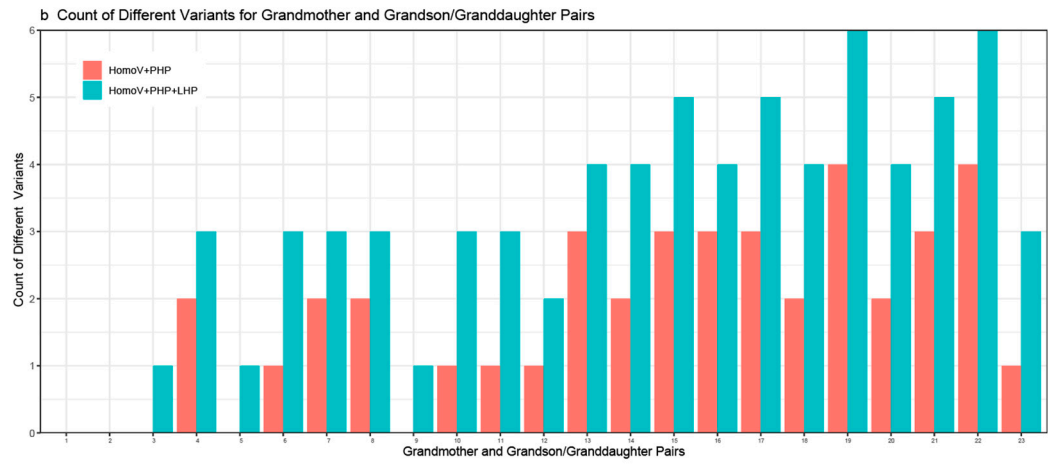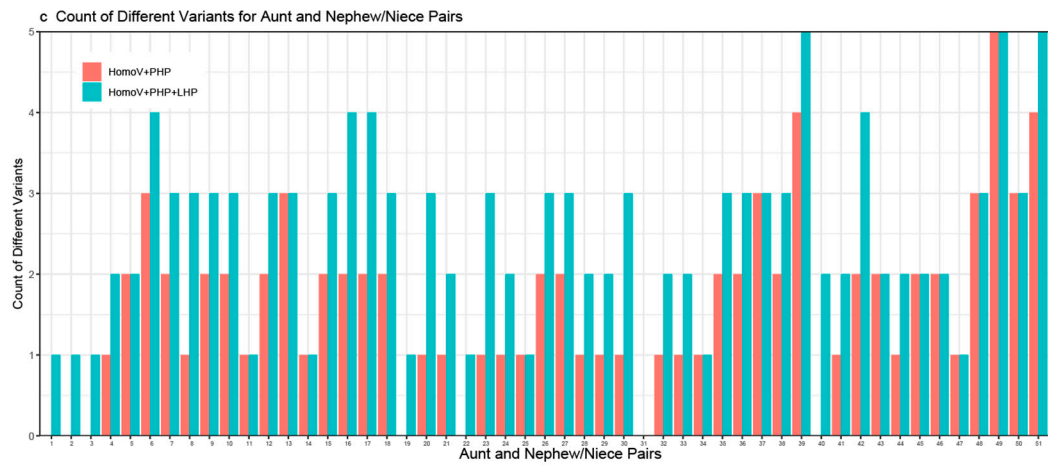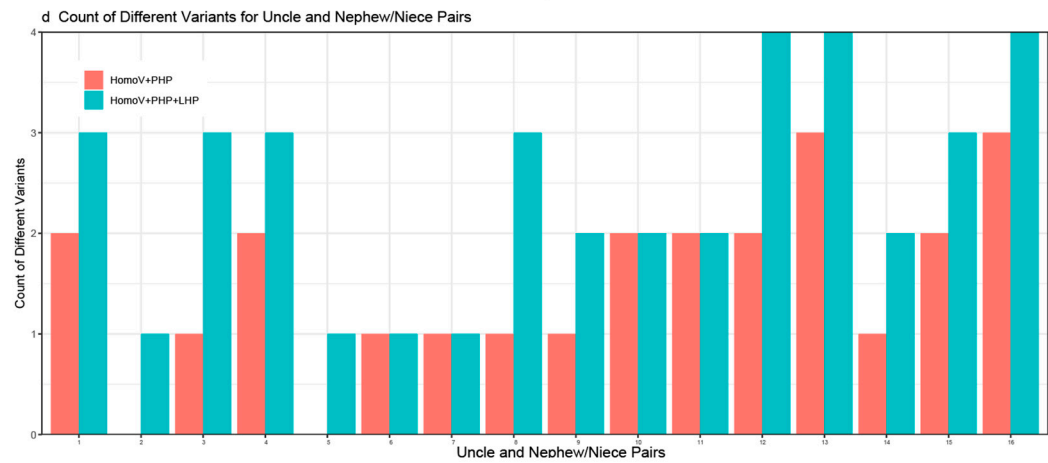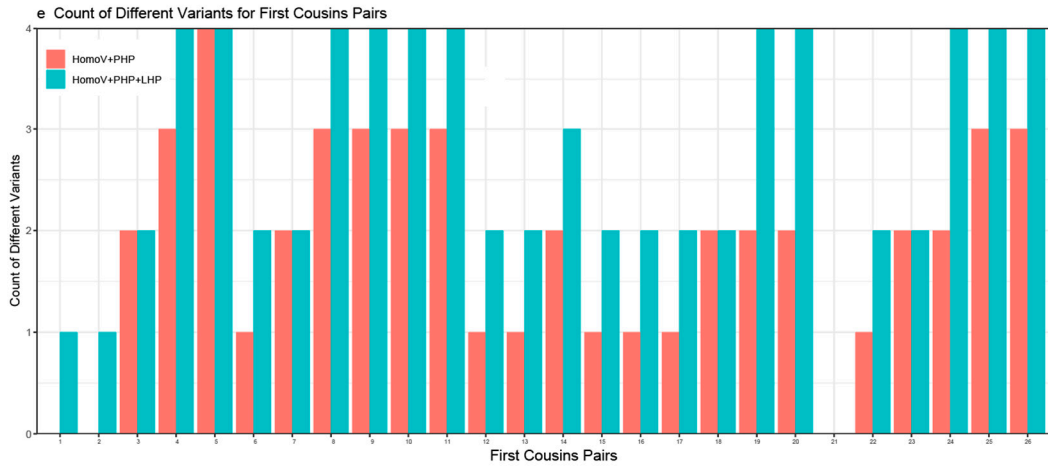

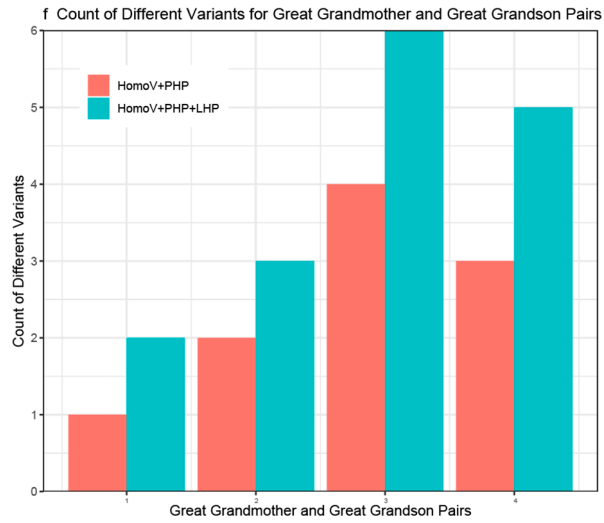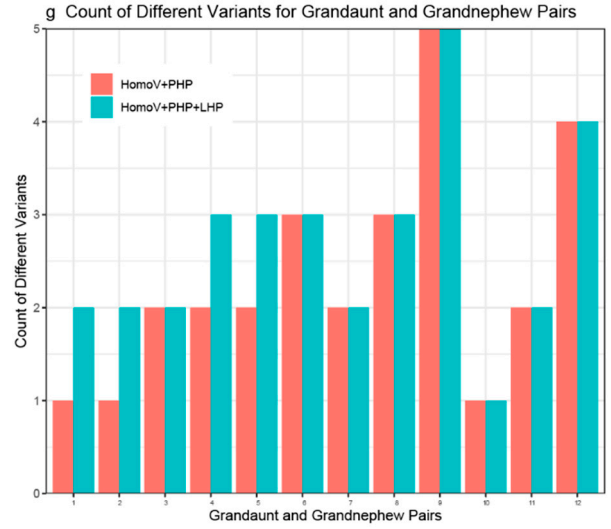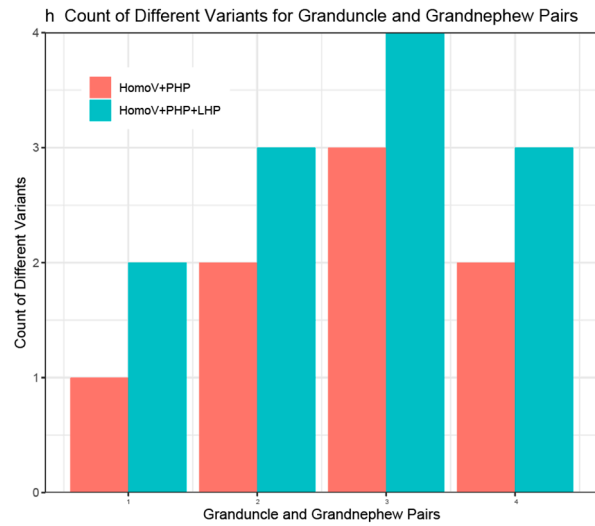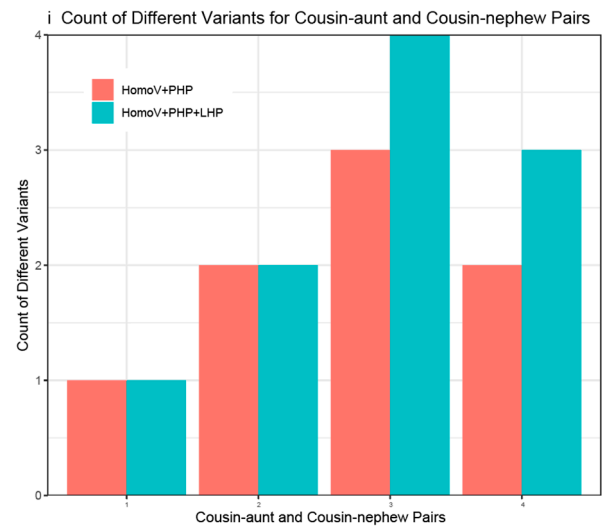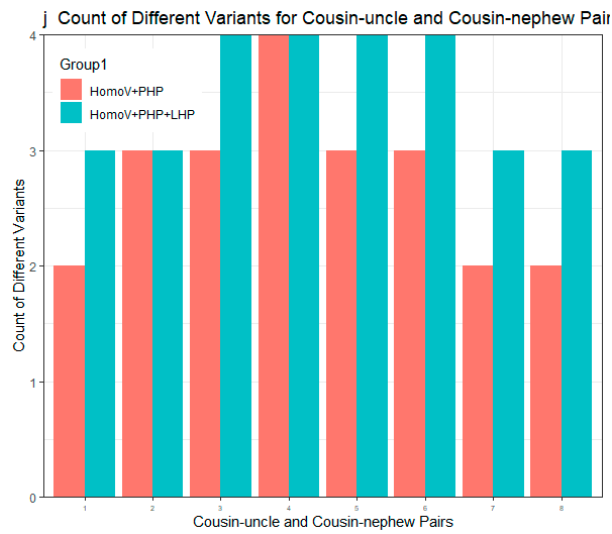

Supplementary Table S1. Comparison of the twice-sequenced libraries.

|           | Depth<br>Difference <sup>a</sup> | Coverage<br>Difference | Count of 'No<br>Call' Difference | Difference between<br>variants | Details of Variant Difference (first & second)                                                                                                                                                                                                                      |
|-----------|----------------------------------|------------------------|----------------------------------|--------------------------------|---------------------------------------------------------------------------------------------------------------------------------------------------------------------------------------------------------------------------------------------------------------------|
| Family1-M | 74300                            | 0.54%                  | -90                              | No                             | /                                                                                                                                                                                                                                                                   |
| Family2-M | 183964                           | 0.36%                  | -60                              | No                             | /                                                                                                                                                                                                                                                                   |
| Family2-C | 169177                           | 1.94%                  | -321                             | Yes                            | 309.1C & 309.1c: 88.6% (263 reads) base call C and 11.4% (34 reads, below AT) reference reads present at position 309.1 in the first run, 90.4% (572 reads) base call C and 9.6% (61 reads, above AT) reference reads present at position 309.1 in the second run.  |
| Family3-M | 148470                           | 0.48%                  | -79                              | Yes                            | 309.1C & 309.1c: 88.6% (263 reads) base call C and 11.4% (34 reads, below AT) reference reads present at position 309.1 in the first run, 81.3% (244 reads) base call C and 18.7% (56 reads, above AT) reference reads present at position 309.1 in the second run. |
| Family3-C | 267576                           | 1.01%                  | -168                             | No                             | /                                                                                                                                                                                                                                                                   |
| Family4-M | 127460                           | 0.70%                  | -116                             | Yes                            | 961C & 961c: 100% (930 reads) base call C present at position 961 in the first run, 93.6% (1158 reads) base call C and 6.4% (79 reads, above AT) deletion present at position 961 in the second run.                                                                |

|           |        |       |      |     |                                                                                                                                                                                                                                                                                                                                                                                                                                                               |
|-----------|--------|-------|------|-----|---------------------------------------------------------------------------------------------------------------------------------------------------------------------------------------------------------------------------------------------------------------------------------------------------------------------------------------------------------------------------------------------------------------------------------------------------------------|
| Family4-C | 299532 | 0.71% | -118 | Yes | 309.2C & 309.2c, 965.1c & 965.2c: 67.6% (75 reads) base call C and 32.4% (36 reads, below AT) reference reads present at position 309.2 in the first run, 68.1% (141 reads) base call C and 31.9% (66 reads, above AT) reference reads present at position 309.2 in the second run; no base call present at 965.2 in the first run, 17.9% (71 reads, above AT) base call C and 82.1% (326 reads) reference reads present at position 965.2 in the second run. |
| Family5-C | 180251 | 0.15% | -25  | No  | /                                                                                                                                                                                                                                                                                                                                                                                                                                                             |
| Family6-M | 216423 | 1.73% | -286 | Yes | N <sup>b</sup> & 309.1C, N & 315.1C: no reads was detected at the amplicon where 309 and 315 located in the first run, 89.5% (51 reads, above AT) base call C present at position 309.1 and 96.4% (53 reads, above AT) base call C present at position 315.1 in the second run.                                                                                                                                                                               |
| Family6-C | 133173 | 0.54% | -89  | Yes | 309.1C & N: 100% (46 reads, above AT) base call C present at position 309.1 in the first run, no reads were detected in the second run.                                                                                                                                                                                                                                                                                                                       |
| Family7-M | 166767 | 0.97% | -161 | Yes | 8271DEL & 8271a, N & 16193.1c: 100% (10985 reads) base deletion present at position 8271 in the first run, 89.7% (17443 reads) base deletion and 10.9% (2143 reads, above AT) base call A present at position 8271 in the second run; no reads were detected at position 16193.1 in the first run, 10.9% (62 reads, above AT) base call A and 89.1% (508                                                                                                      |

|           |         |        |      |     |                                                                                                                                                                                                                                                                                                                                                                                                                                                                                                                                                                                                                                                                                                                                                                                                                                                                                                                                                                                                                                |
|-----------|---------|--------|------|-----|--------------------------------------------------------------------------------------------------------------------------------------------------------------------------------------------------------------------------------------------------------------------------------------------------------------------------------------------------------------------------------------------------------------------------------------------------------------------------------------------------------------------------------------------------------------------------------------------------------------------------------------------------------------------------------------------------------------------------------------------------------------------------------------------------------------------------------------------------------------------------------------------------------------------------------------------------------------------------------------------------------------------------------|
| Family7-C | 157583  | 1.82%  | -302 | Yes | reads) reference reads present at position 16193.1 in the second run.<br>N & 7364G, 8271DEL & 8271a, 16182C & 16182c, N & 16193.1c, N & 16217C: no reads was detected at position 7364 in the first run, 100% (90 reads, above AT) base call G present at position7364 in the second run; 100% (7974 reads) base deletion present at position 8271 in the first run, 93.3% (12482 reads) base deletion and 6.7% (902 reads, above AT) base call A present at position 8271 in the second run; 100% (205 reads) base call C present at position 16182 in the first run, 85.2% (387 reads) base call C and 14.8% (67 reads, above AT) deletion present at position 16182 in the second run; no reads was detected at position 16193.1 in the first run, 14.4% (66 reads, above AT) base call A and 85.6% (393 reads) reference reads present at position 16193.1 in the second run; no reads was detected at position 162117 in the first run, 100% (74 reads, above AT) base call C present at position16217 in the second run. |
| Family8-C | 238623  | 0.91%  | -151 | No  | /                                                                                                                                                                                                                                                                                                                                                                                                                                                                                                                                                                                                                                                                                                                                                                                                                                                                                                                                                                                                                              |
| JX-N      | 40738   | 1.10%  | -182 | No  | /                                                                                                                                                                                                                                                                                                                                                                                                                                                                                                                                                                                                                                                                                                                                                                                                                                                                                                                                                                                                                              |
| P15-H     | -24703  | 0.07%  | 6    | No  | /                                                                                                                                                                                                                                                                                                                                                                                                                                                                                                                                                                                                                                                                                                                                                                                                                                                                                                                                                                                                                              |
| P14-B     | -564921 | -0.04% | -11  | Yes | 965.3c & 965.2c: 10.3% (45 reads, above AT) base call C and 89.7% (390 reads) reference reads                                                                                                                                                                                                                                                                                                                                                                                                                                                                                                                                                                                                                                                                                                                                                                                                                                                                                                                                  |

---

present at position965.3 in the first run, no base call  
present at 965.3 in the second run.

<sup>a</sup> Difference = data of the second run - data of the first run;

<sup>b</sup> ‘N’ represents no base call at this position.

Supplementary Table S2. MtGenome coverage, observed variants, haplogroup assignment and count of heteroplasmy in the research samples.

| Sample ID | mtGenome Coverage | Observed Variants                                                                                                                                                                                                                                                                          | Haplogroup | Super Haplogroup | Count of PHP/LHP |
|-----------|-------------------|--------------------------------------------------------------------------------------------------------------------------------------------------------------------------------------------------------------------------------------------------------------------------------------------|------------|------------------|------------------|
| Family1-M | 99.93%            | 73G 152Y 194T 199C 263G 315.1C 489C 523a524c 750G 1382C 1438G 2706G 3010A 4769G 4883T 5178A 5616G 7028T 8020A 8414T 8701G 8860G 8964T 9296T 9540C 9824A 10398G 10400T 10873C 11719A 12705T 14668T 14766T 14783C 15043A 15301A 15326G 16094C 16111T 16187T 16223T 16362C 16519C             | D4b2b      | M                | 1/1              |
| Family1-C | 99.55%            | 73G 152Y 194T 199C 263G 315.1C 489C 523a524c 750G 1382C 1438G 2706G 3010A 4769G 4883T 5178A 5616G 7028T 8020A 8414T 8701G 8860G 8964T 9296T 9540C 9824A 10398G 10400T 10873C 11719A 12705T 14668T 14766T 14783C 15043A 15301A 15326G 16094C 16111T 16187T 16223T 16362C 16519C             | D4b2b      | M                | 1/1              |
| Family2-M | 99.24%            | 73G 150T 199C 204C 263G 309.1c 315.1C 489C 750G 1438G 2706G 3736A 4164G 4769G 5351G 5460A 6455T 6680C 7028T 7444A 7684C 7853A 8701G 8860G 9540C 9824C 10397G 10398G 10400T 10873C 11719A 12405T 12705T 12811C 14766T 14783C 15043A 15301A 15326G 16129A 16192T 16223T 16297C 16362C 16400T | M7b1a1h    | M                | 0/1              |
| Family2-C | 99.31%            | 73G 150T 199C 204C 263G 309.1c 315.1C 489C 750G 1438G 2706G 3736A 4164G 4769G 5351G 5460A 6455T 6680C 7028T 7444A 7684C                                                                                                                                                                    | M7b1a1h    | M                | 0/1              |



|           |        |                                                                                                                                                                                                                                                                                                                                                                                                                                                                  |         |   |     |
|-----------|--------|------------------------------------------------------------------------------------------------------------------------------------------------------------------------------------------------------------------------------------------------------------------------------------------------------------------------------------------------------------------------------------------------------------------------------------------------------------------|---------|---|-----|
| Family3-M | 99.76% | 7853A 8701G 8860G 9540C 9824C 10397G 10398G 10400T 10873C<br>11719A 12405T 12705T 12811C 14766T 14783C 15043A 15301A<br>15326G 16129A 16192T 16223T 16297C 16362C 16400T<br>73G 228A 249DEL 263G 309.1c 315.1C 523a524c 548T 750G 1438G<br>2706G 3645C 3970T 4086T 4769G 6392C 6962A 7028T 8479G 8860G<br>9053A 9548A 10211T 10310A 10609C 11719A 12361R 12406A<br>12882T 13759A 13928C 14325C 14766T 15326G 16129A 16162G<br>16172C 16274A 16304C 16311C 16519C | Fla1c   | N | 1/2 |
| Family3-C | 99.50% | 73G 228A 249DEL 263G 309.1C 315.1C 523a524c 548T 750G 1438G<br>2706G 3645C 3970T 4086T 4769G 6392C 6962A 7028T 8479G 8860G<br>9053A 9548A 10211T 10310A 10609C 11719A 12406A 12882T<br>13759A 13928C 14325C 14766T 15326G 16129A 16162G 16172C<br>16274A 16304C 16311C 16519C                                                                                                                                                                                    | Fla1c   | N | 0/1 |
| Family4-M | 99.95% | 73G 150T 263G 309.1C 309.2c 315.1C 750G 960.1C 960.2C 961C<br>1438G 2706G 4769G 5231A 5417A 5773A 7028T 8860G 11719A<br>12358G 12372A 12705T 12950G 14766T 15067C 15326G 16223T<br>16257A 16261T                                                                                                                                                                                                                                                                 | N9a2    | N | 0/2 |
| Family4-C | 99.93% | 73G 150T 263G 309.1C 309.2c 315.1C 750G 960.1C 960.2C 961C<br>1438G 2706G 4769G 5231A 5417A 5773A 7028T 8860G 11719A<br>12358G 12372A 12705T 12950G 14766T 15067C 15326G 16223T<br>16257A 16261T                                                                                                                                                                                                                                                                 | N9a2    | N | 0/2 |
| Family5-M | 99.95% | 73G 152C 194T 263G 315.1C 489C 523a524c 750G 1382C 1438G<br>2706G 3010A 4769G 4883T 5178A 7028T 8020A 8414T 8577G 8701G<br>8860G 8964T 9296T 9540C 9824A 10398G 10400T 10873C 11719A<br>12358G 12705T 14668T 14766T 14783C 15043A 15301A 15326G<br>16172C 16362C 16519C                                                                                                                                                                                          | D4b2b2b | M | 0/1 |

|               |        |                                                                                                                                                                                                                                                             |         |   |     |
|---------------|--------|-------------------------------------------------------------------------------------------------------------------------------------------------------------------------------------------------------------------------------------------------------------|---------|---|-----|
| Family5-<br>C | 99.96% | 73G 152C 194T 263G 315.1C 489C 523a524c 750G 1382C 1438G 2706G 3010A 4769G 4883T 5178A 7028T 8020A 8414T 8577G 8701G 8860G 8964T 9296T 9540C 9824A 10398G 10400T 10873C 11719A 12358G 12705T 14668T 14766T 14783C 15043A 15301A 15326G 16172C 16362C 16519C | D4b2b2b | M | 0/1 |
| Family6-<br>M | 99.84% | 73G 257G 263G 309.1C 315.1C 489C 750G 856G 1438G 2706G 2766T 3010A 4769G 4883T 5178A 6986G 7028T 8414T 8701G 8860G 9540C 10042G 10398G 10400T 10873C 11719A 12705T 14668T 14766T 14783C 15043A 15301A 15326G 15704T 16224C 16245T 16292T 16362C 16519C      | D4c1b   | M | 0/0 |
| Family6-<br>C | 98.69% | 73G 257G 263G 309.1C 315.1C 489C 750G 856G 1438G 2706G 2766T 3010A 4769G 4883T 5178A 6986G 7028T 8414T 8701G 8860G 9540C 10042G 10398G 10400T 10873C 11719A 12705T 14668T 14766T 14783C 15043A 15301A 15326G 15704T 16224C 16245T 16292T 16362C 16519C      | D4c1b   | M | 0/0 |
| Family7-<br>M | 99.82% | 73G 146C 195C 263G 315.1C 523a524c 750G 1438G 2706G 4769G 5093C 7028T 7364G 8271-8279DEL 8860G 8952C 11719A 12028C 13269G 14766T 15115Y 15326G 16129A 16182C 16183C 16189C 16193.1c 16217C 16261T                                                           | B4h     | N | 1/3 |
| Family7-<br>C | 99.35% | 73G 146C 195C 263G 315.1C 523a524c 750G 1438G 2706G 4769G 5093C 7028T 7364G 8271-8279DEL 8860G 8952C 11719A 12028C 13269G 14766T 15326G 16129A 16182C 16183C 16189C 16193.1c 16217C 16261T                                                                  | B4h     | N | 0/3 |
| Family8-<br>M | 99.34% | 73G 189G 249DEL 263G 309.1C 315.1C 750G 1005C 1438G 1824C 2706G 3386Y 3970T 4769G 6392C 7028T 7828G 8860G 10310A 10535C 10586A 11150A 11719A 12338C 13708A 13722G 13928C                                                                                    | F2c1    | N | 1/1 |

|           |        |                                                                                                                                                                                                                                                               |      |   |     |
|-----------|--------|---------------------------------------------------------------------------------------------------------------------------------------------------------------------------------------------------------------------------------------------------------------|------|---|-----|
| Family8-C | 99.66% | 14766T 15326G 15714T 16183C 16189C 16193.1c 16304C 16355T 16519C                                                                                                                                                                                              | F2c1 | N | 1/1 |
|           |        | 73G 189G 249DEL 263G 309.1C 315.1C 750G 1005C 1438G 1824C 2706G 3386Y 3970T 4769G 6392C 7028T 7828G 8860G 10310A 10535C 10586A 11150A 11719A 12338C 13708A 13722G 13928C 14766T 15326G 15714T 16183C 16189C 16193.1c 16304C 16355T 16519C                     |      |   |     |
| JX-N      | 99.74% | 73G 152C 263G 309.1c 315.1C 489C 750G 1438G 2706G 4715G 4769G 4958G 5100T 5402G 6179A 7028T 7196A 8584A 8684T 8701G 8860G 9540C 10398G 10400T 10873C 11719A 12705T 13488C 14470C 14766T 14783C 15043A 15301A 15326G 15487T 16184T 16223T 16293G 16298C 16319A | M8a3 | M | 0/1 |
| JX-M1     | 99.94% | 73G 152C 263G 309.1c 315.1C 489C 750G 1438G 2706G 4715G 4769G 4958G 5100T 5402G 6179A 7028T 7196A 8584A 8684T 8701G 8860G 9540C 10398G 10400T 10873C 11719A 12705T 13488C 14470C 14766T 14783C 15043A 15301A 15326G 15487T 16184T 16223T 16293G 16298C 16319A | M8a3 | M | 0/1 |
| JX-C1     | 99.70% | 73G 152C 263G 309.1c 315.1C 489C 750G 1438G 2706G 4715G 4769G 4958G 5100T 5402G 6179A 7028T 7196A 8584A 8684T 8701G 8860G 9540C 10398G 10400T 10873C 11719A 12705T 13488C 14470C 14766T 14783C 15043A 15301A 15326G 15487T 16184T 16223T 16293G 16298C 16319A | M8a3 | M | 0/1 |
| JX-C2     | 99.98% | 73G 152C 263G 309.1c 315.1C 489C 750G 1438G 2706G 4715G 4769G 4958G 5100T 5402G 6179A 7028T 7196A 8584A 8684T 8701G 8860G 9540C 10398G 10400T 10873C 11719A 12705T 13488C                                                                                     | M8a3 | M | 0/1 |

|       |         |                                                                                                                                                                                                                                                                              |      |   |     |
|-------|---------|------------------------------------------------------------------------------------------------------------------------------------------------------------------------------------------------------------------------------------------------------------------------------|------|---|-----|
|       |         | 14470C 14766T 14783C 15043A 15301A 15326G 15487T 16184T<br>16223T 16293G 16298C 16319A<br>73G 152C 263G 309.1C 315.1C 489C 750G 1438G 2706G 4715G<br>4769G 4958G 5100T 5402G 6179A 7028T 7196A 8584A 8684T 8701G                                                             |      |   |     |
| JX-M2 | 99.99%  | 8860G 9540C 10398G 10400T 10873C 11719A 12705T 13488C<br>14470C 14766T 14783C 15043A 15301A 15326G 15487T 16184T<br>16223T 16293G 16298C 16319A<br>73G 152C 263G 309.1C 315.1C 489C 750G 1438G 2706G 4715G<br>4769G 4958G 5100T 5402G 6179A 7028T 7196A 8584A 8684T 8701G    | M8a3 | M | 0/0 |
| JX-C3 | 99.93%  | 8860G 9540C 10398G 10400T 10873C 11719A 12705T 13488C<br>14470C 14766T 14783C 15043A 15301A 15326G 15487T 16184T<br>16223T 16293G 16298C 16319A<br>73G 235G 263G 309.1C 315.1C 318C 523a524c 663G 750G 960.1C<br>960.2C 961C 1415A 1438G 1736G 2706G 4248C 4769G 4824G 7028T | M8a3 | M | 0/0 |
| P01-B | 100.00% | 7657C 8563G 8794T 8860G 11536T 11719A 12705T 13260C 14766T<br>14854T 15326G 16184T 16223T 16290T 16319A 16519C<br>73G 235G 251R 263G 315.1C 318C 523a524c 663G 750G 960.1C<br>960.2C 961C 1415A 1438G 1736G 2706G 4248C 4769G 4824G                                          | A5b  | N | 0/2 |
| P01-H | 100.00% | 7028T 7657C 8563G 8794T 8860G 11118Y 11536T 11719A 12705T<br>13260C 14766T 14854T 15326G 16184T 16223T 16290T 16319A<br>16519C<br>73G 235G 263G 309.1C 315.1C 318C 523a524c 663G 750G 960.1C<br>960.2C 960.3C 961C 1415A 1438G 1736G 2706G 4248C 4769G                       | A5b  | N | 2/2 |
| P03-B | 100.00% | 4824G 7028T 7657C 8563G 8794T 8860G 11536T 11719A 12705T<br>13260C 13683M 14766T 14854T 15326G 16184T 16223T 16290T<br>16319A 16519C                                                                                                                                         | A5b  | N | 1/2 |

|       |         |                                                                                                                                                                                                                                                       |     |   |     |
|-------|---------|-------------------------------------------------------------------------------------------------------------------------------------------------------------------------------------------------------------------------------------------------------|-----|---|-----|
| P03-H | 100.00% | 73G 235G 263G 309.1c 315.1C 318C 523a524c 663G 750G 960.1C<br>960.2C 960.3C 961C 1415A 1438G 1736G 2706G 4248C 4769G<br>4824G 7028T 7657C 8563G 8794T 8860G 11536T 11719A 12705T<br>13260C 14766T 14854T 15326G 16184T 16223T 16290T 16319A<br>16519C | A5b | N | 0/3 |
| P04-B | 100.00% | 73G 235G 263G 309.1C 315.1C 318C 523a524c 663G 750G 960.1C<br>960.2C 961C 1415A 1438G 1736G 2706G 4248C 4769G 4824G<br>7028T 7657C 8563G 8794T 8860G 11536T 11719A 12705T 13260C<br>14766T 14854T 15326G 16184T 16223T 16290T 16319A 16519C           | A5b | N | 0/2 |
| P04-H | 100.00% | 73G 235G 263G 309.1C 315.1C 318C 523a524c 663G 750G 960.1C<br>960.2C 961C 1415A 1438G 1736G 2706G 4248C 4769G 4824G 7028T<br>7657C 8563G 8794T 8860G 11536T 11719A 12705T 13260C 14766T<br>14854T 15326G 16184T 16223T 16290T 16319A 16519C           | A5b | N | 0/2 |
| P06-B | 100.00% | 73G 235G 263G 309.1C 315.1C 318C 523a524c 663G 750G 960.1C<br>960.2C 960.3C 961C 1415A 1438G 1736G 2706G 4248C 4769G 4824G<br>7028T 7657C 8563G 8794T 8860G 11536T 11719A 12705T 13260C<br>14766T 14854T 15326G 16184T 16223T 16290T 16319A 16519C    | A5b | N | 0/2 |
| P06-H | 100.00% | 73G 235G 263G 309.1C 315.1C 318C 523a524c 663G 750G 960.1C<br>960.2C 961C 1415A 1438G 1736G 2706G 4248C 4475C 4769G 4824G<br>7028T 7657C 8563G 8794T 8860G 11536T 11719A 12705T 13260C<br>14766T 14854T 15326G 16184T 16223T 16290T 16319A 16519C     | A5b | N | 0/2 |
| P08-B | 100.00% | 73G 235G 263G 309.1C 315.1C 318C 523a524c 663G 750G 960.1C<br>960.2C 961C 1415A 1438G 1736G 2706G 4248C 4769G 4824G 7028T<br>7657C 8563G 8794T 8860G 9083Y 11536T 11719A 12705T 13260C<br>14766T 14854T 15326G 16184T 16223T 16290T 16319A 16519C     | A5b | N | 1/2 |

|       |         |                                                                                                                                                                                                                                                                    |     |   |     |
|-------|---------|--------------------------------------------------------------------------------------------------------------------------------------------------------------------------------------------------------------------------------------------------------------------|-----|---|-----|
| P08-H | 100.00% | 73G 235G 263G 309.1C 315.1C 318C 523a524c 663G 750G 960.1C<br>960.2C 961C 1415A 1438G 1736G 2706G 4248C 4769G 4824G 5843R<br>7028T 7657C 8563G 8794T 8860G 11536T 11719A 12705T 13260C<br>13269R 13679M 14766T 14854T 15326G 16184T 16223T 16290T<br>16319A 16519C | A5b | N | 3/2 |
| P09-B | 100.00% | 73G 235G 263G 309.1c 315.1C 318C 523a524c 663G 750G 960.1C<br>960.2C 961C 1415A 1438G 1736G 2706G 4248C 4769G 4824G 7028T<br>7657C 8563G 8794T 8860G 11536T 11719A 12705T 13260C 14766T<br>14854T 15326G 16184T 16223T 16290T 16319A 16519C                        | A5b | N | 0/3 |
| P09-H | 100.00% | 73G 235G 263G 309.1c 315.1C 318C 523a524c 663G 750G 960.1C<br>960.2C 961C 1415A 1438G 1736G 2706G 3290Y 4248C 4769G 4776S<br>4824G 7028T 7657C 8563G 8794T 8860G 11536T 11719A 12705T<br>13260C 14766T 14854T 15326G 16184T 16223T 16290T 16319A<br>16519C         | A5b | N | 2/3 |
| P12-B | 100.00% | 73G 235G 263G 309.1C 315.1C 318C 523a524c 663G 750G 960.1C<br>960.2C 961C 1415A 1438G 1736G 2706G 4248C 4769G 4824G 7028T<br>7657C 8563G 8794T 8860G 11536T 11719A 12705T 13260C 13678M<br>14215Y 14766T 14854T 15326G 16184T 16223T 16290T 16319A<br>16519C       | A5b | N | 2/2 |
| P12-H | 100.00% | 73G 235G 263G 309.1C 315.1C 318C 523a524c 663G 750G 960.1C<br>960.2C 961C 1415A 1438G 1736G 2706G 4248C 4769G 4824G 7028T<br>7657C 8563G 8794T 8860G 11536T 11719A 12425.1a 12705T 13260C<br>14766T 14854T 15326G 16184T 16223T 16290T 16319A 16519C               | A5b | N | 0/3 |
| P13-B | 100.00% | 73G 235G 263G 309.1C 315.1C 318C 523a524c 663G 750G 960.1C<br>960.2C 961C 1415A 1438G 1736G 2706G 4248C 4769G 4824G 7028T                                                                                                                                          | A5b | N | 0/2 |

|       |         |                                                                                                                                                                                                                                                                                                                                                                                                                                                                                                                                                                                                                                      |     |   |     |
|-------|---------|--------------------------------------------------------------------------------------------------------------------------------------------------------------------------------------------------------------------------------------------------------------------------------------------------------------------------------------------------------------------------------------------------------------------------------------------------------------------------------------------------------------------------------------------------------------------------------------------------------------------------------------|-----|---|-----|
| P13-H | 100.00% | 7657C 8563G 8794T 8860G 11536T 11719A 12705T 13260C 14766T<br>14854T 15326G 16184T 16223T 16290T 16319A 16519C<br>73G 235G 263G 309.1c 315.1C 318C 523a524c 663G 750G 960.1C<br>960.2C 961C 1415A 1438G 1736G 2706G 4248C 4769G 4824G 7028T<br>7657C 8563G 8794T 8860G 11536T 11719A 12705T 13260C 13679M<br>14766T 14854T 15326G 16184T 16223T 16290T 16319A 16519C<br>73G 235G 263G 309.1C 315.1C 318C 523a524c 663G 750G 960.1C<br>960.2C 960.3C 961C 1415A 1438G 1736G 2706G 4248C 4769G 4824G<br>7028T 7657C 8563G 8794T 8860G 11536T 11719A 12705T 13260C<br>13683S 14766T 14854T 15326G 16184T 16223T 16290T 16319A<br>16519C | A5b | N | 1/3 |
| P14-B | 100.00% | 73G 235G 263G 309.1C 315.1C 318C 523a524c 663G 750G 960.1C<br>960.2C 960.3C 961C 1415A 1438G 1736G 2706G 4248C 4769G 4824G<br>7028T 7657C 8563G 8794T 8860G 11536T 11719A 12705T 13260C<br>13683S 14766T 14854T 15326G 16184T 16223T 16290T 16319A<br>16519C                                                                                                                                                                                                                                                                                                                                                                         | A5b | N | 1/2 |
| P14-H | 100.00% | 73G 235G 263G 309.1c 315.1C 318C 523a524c 663G 750G 960.1C<br>960.2C 961C 1227R 1415A 1438G 1736G 2706G 4248C 4769G 4824G<br>7028T 7657C 8563G 8794T 8860G 11536T 11719A 12705T 13260C<br>14766T 14854T 15326G 16184T 16223T 16290T 16319A 16519C                                                                                                                                                                                                                                                                                                                                                                                    | A5b | N | 1/3 |
| P15-B | 100.00% | 73G 235G 263G 309.1C 315.1C 318C 523a524c 663G 750G 960.1C<br>960.2C 961C 1415A 1438G 1736G 2706G 4248C 4769G 4824G 7028T<br>7657C 8563G 8794T 8860G 9083Y 11536T 11719A 12705T 13260C<br>14766T 14854T 15326G 16154Y 16184T 16223T 16290T 16319A<br>16519C                                                                                                                                                                                                                                                                                                                                                                          | A5b | N | 2/2 |
| P15-H | 99.74%  | 73G 235G 263G 309.1C 315.1C 318C 523a524c 663G 750G 961C<br>1415A 1438G 1606R 1736G 2706G 4248C 4769G 4824G 7028T 7657C<br>8563G 8794T 8860G 11536T 11719A 12705T 13260C 14766T 14854T<br>15326G 16184T 16223T 16290T 16319A 16519C                                                                                                                                                                                                                                                                                                                                                                                                  | A5b | N | 1/1 |
| P18-B | 100.00% | 73G 235G 263G 309.1C 315.1C 318C 523a524c 663G 750G 960.1C<br>960.2C 961C 1415A 1438G 1736G 2706G 4248C 4769G 4824G 7028T                                                                                                                                                                                                                                                                                                                                                                                                                                                                                                            | A5b | N | 1/2 |

|       |         |                                                                                                                                                                                                                                                                                                                                                                                      |     |   |     |
|-------|---------|--------------------------------------------------------------------------------------------------------------------------------------------------------------------------------------------------------------------------------------------------------------------------------------------------------------------------------------------------------------------------------------|-----|---|-----|
| P18-H | 100.00% | 7657C 8563G 8794T 8860G 11536T 11719A 12705T 13260C 14766T<br>14854T 15326G 16184T 16223T 16278Y 16290T 16319A 16519C<br>73G 235G 263G 309.1C 315.1C 318C 523a524c 663G 750G 960.1C<br>960.2C 961C 1415A 1438G 1736G 2706G 4248C 4769G 4824G 5591R<br>7028T 7657C 8563G 8794T 8860G 11536T 11719A 12705T 13260C<br>14215Y 14766T 14854T 15326G 16184T 16223T 16290T 16319A<br>16519C | A5b | N | 2/2 |
|-------|---------|--------------------------------------------------------------------------------------------------------------------------------------------------------------------------------------------------------------------------------------------------------------------------------------------------------------------------------------------------------------------------------------|-----|---|-----|

Supplementary Table S3. Different variations of the HL60 samples in different studies.

| Position | This study      | Validation of ForenSeq<br>mtGenome Kit [42] | Lot-to-lot study of<br>control DNA[54] | Certificate of<br>SRM2392-I [55] |
|----------|-----------------|---------------------------------------------|----------------------------------------|----------------------------------|
| 2445     | T2445 (100% T)  | 2445Y                                       | 2445Y                                  | T2445                            |
| 4821     | 4821R (7.4% A)  | G4821                                       | G4821                                  | G4821                            |
| 12071    | T12071 (1.1% C) | 12071Y                                      | 12071Y                                 | 12071Y                           |

Supplementary Table S4. Comparison reports of the 11 kinds of maternal relationships.

**a. Homoplasmic variants only**

| Relationship                                                | Cannot<br>Exclude | Inconclusive | Exclusion | %Cannot<br>Exclude | %Inconclusive | %Exclusion |
|-------------------------------------------------------------|-------------------|--------------|-----------|--------------------|---------------|------------|
| mother and offspring                                        | 49                | 4            | 0         | 92.45%             | 7.55%         | 0.00%      |
| full-siblings                                               | 34                | 8            | 0         | 80.95%             | 19.05%        | 0.00%      |
| maternal grandmother and<br>maternal grandson/granddaughter | 23                | 0            | 0         | 100.00%            | 0.00%         | 0.00%      |
| maternal aunt and maternal<br>nephew/niece                  | 45                | 6            | 0         | 88.24%             | 11.76%        | 0.00%      |



|                                                        |    |   |   |         |        |       |
|--------------------------------------------------------|----|---|---|---------|--------|-------|
| maternal uncle and maternal nephew/niece               | 16 | 0 | 0 | 100.00% | 0.00%  | 0.00% |
| maternal first cousins                                 | 26 | 0 | 0 | 100.00% | 0.00%  | 0.00% |
| maternal great grandmother and maternal great grandson | 4  | 0 | 0 | 100.00% | 0.00%  | 0.00% |
| maternal grandaunt and maternal grandnephew            | 10 | 2 | 0 | 83.33%  | 16.67% | 0.00% |
| maternal granduncle and maternal grandnephew           | 4  | 0 | 0 | 100.00% | 0.00%  | 0.00% |
| maternal cousin-aunt and maternal cousin-nephew        | 4  | 0 | 0 | 100.00% | 0.00%  | 0.00% |
| maternal cousin-uncle and maternal cousin-nephew       | 8  | 0 | 0 | 100.00% | 0.00%  | 0.00% |

#### **b. Homoplasmic variants and PHPs**

| Relationship                                             | Cannot Exclude | Inconclusive | Exclusion | %Cannot Exclude | %Inconclusive | %Exclusion | %Exclusion Compared to HomoV <sup>a</sup> only |
|----------------------------------------------------------|----------------|--------------|-----------|-----------------|---------------|------------|------------------------------------------------|
| mother and offspring                                     | 20             | 12           | 21        | 37.74%          | 22.64%        | 39.62%     | 39.62%                                         |
| full-siblings                                            | 10             | 18           | 14        | 23.81%          | 42.86%        | 33.33%     | 33.33%                                         |
| maternal grandmother and maternal grandson/granddaughter | 5              | 5            | 13        | 21.74%          | 21.74%        | 56.52%     | 56.52%                                         |
| maternal aunt and maternal nephew/niece                  | 7              | 18           | 26        | 13.73%          | 35.29%        | 50.98%     | 50.98%                                         |
| maternal uncle and maternal nephew/niece                 | 2              | 6            | 8         | 12.50%          | 37.50%        | 50.00%     | 50.00%                                         |

|                                                           |   |   |    |        |        |         |         |
|-----------------------------------------------------------|---|---|----|--------|--------|---------|---------|
| maternal first cousins                                    | 3 | 7 | 16 | 11.54% | 26.92% | 61.54%  | 61.54%  |
| maternal great grandmother and<br>maternal great grandson | 0 | 1 | 3  | 0.00%  | 25.00% | 75.00%  | 75.00%  |
| maternal grandaunt and maternal<br>grandnephew            | 0 | 3 | 9  | 0.00%  | 25.00% | 75.00%  | 75.00%  |
| maternal granduncle and maternal<br>grandnephew           | 0 | 1 | 3  | 0.00%  | 25.00% | 75.00%  | 75.00%  |
| maternal cousin-aunt and maternal<br>cousin-nephew        | 0 | 1 | 3  | 0.00%  | 25.00% | 75.00%  | 75.00%  |
| maternal cousin-uncle and<br>maternal cousin-nephew       | 0 | 0 | 8  | 0.00%  | 0.00%  | 100.00% | 100.00% |

### c. Homoplasmic variants, PHPs and LHPs

| Relationship                                                | Cannot<br>Exclude | Inconclusive | Exclusion | %Cannot<br>Exclude | %Inconclusive | %Exclusion | %Exclusion<br>Compared to<br>HomoV only | %exclusion<br>compared to<br>HomoV+PHP |
|-------------------------------------------------------------|-------------------|--------------|-----------|--------------------|---------------|------------|-----------------------------------------|----------------------------------------|
| mother and offspring                                        | 11                | 9            | 33        | 20.75%             | 16.98%        | 62.26%     | 62.26%                                  | 22.64%                                 |
| full-siblings                                               | 1                 | 9            | 32        | 2.38%              | 21.43%        | 76.19%     | 76.19%                                  | 42.86%                                 |
| maternal grandmother and<br>maternal grandson/granddaughter | 2                 | 3            | 18        | 8.70%              | 13.04%        | 78.26%     | 78.26%                                  | 21.74%                                 |
| maternal aunt and maternal<br>nephew/niece                  | 1                 | 10           | 40        | 1.96%              | 19.61%        | 78.43%     | 78.43%                                  | 27.45%                                 |
| maternal uncle and maternal<br>nephew/niece                 | 0                 | 4            | 12        | 0.00%              | 25.00%        | 75.00%     | 75.00%                                  | 25.00%                                 |
| maternal first cousins                                      | 1                 | 2            | 23        | 3.85%              | 7.69%         | 88.46%     | 88.46%                                  | 26.92%                                 |

|                                                           |   |   |    |       |        |         |         |        |
|-----------------------------------------------------------|---|---|----|-------|--------|---------|---------|--------|
| maternal great grandmother and<br>maternal great grandson | 0 | 0 | 4  | 0.00% | 0.00%  | 100.00% | 100.00% | 25.00% |
| maternal grandaunt and maternal<br>grandnephew            | 0 | 1 | 11 | 0.00% | 8.33%  | 91.67%  | 91.67%  | 16.67% |
| maternal granduncle and maternal<br>grandnephew           | 0 | 0 | 4  | 0.00% | 0.00%  | 100.00% | 100.00% | 25.00% |
| maternal cousin-aunt and maternal<br>cousin-nephew        | 0 | 1 | 3  | 0.00% | 25.00% | 75.00%  | 75.00%  | 0.00%  |
| maternal cousin-uncle and<br>maternal cousin-nephew       | 0 | 0 | 8  | 0.00% | 0.00%  | 100.00% | 100.00% | 0.00%  |

---

<sup>a</sup> HomoV: homoplasmic variant.
